# Supplementary material for: Crystalline silicon photovoltaics: a cost analysis framework for determining technology pathways to reach baseload electricity costs
Source: Royal Society of Chemistry journal article supplement (doi:10.1039/c2ee03489a), 2012-01-01
Supplement: c2ee03489a.zip [file c2ee03489a.zip]

## Sheet: Front Page
Crystalline Silicon Solar Module Bottom-Up Cost Estimator, Version 1.0
Feb 2012		# Supplementary Material (ESI) for Energy & Environmental Science
Doug Powell		# This journal is (c) The Royal Society of Chemistry 2012
MIT Photovoltaic Research Laboratory
	Summary of cost categories
	Cost Category	Model Description	Inputs
	Silicon Feedstock	Calculates kg silicon per cell based on wafer thickness, wafering yield, and manufacturing mechanical yield. Then calculates cost.	Silicon price, wafer thickness, wafering yield, mechanical yields, module efficiency
	Depreciation	Depreciates equipment investment over 5 years, and building over 39 years, and amortizes this cost onto production.	Investment for wafer, cell, and module steps at reference plant size and module efficiency, financing rate and term, plant lifetime, module efficiency
	Maintenance	Calculates yearly maintenance costs and amortizes them onto product cost.	Percentage of initial capital investment spent per year on maintenance
	Labor	Calculates amount of worker hours per m2 of production for wafer, cell, and module production steps. Then calculates cost.	Number of employees required per MW/yr of production for wafer, cell, and module steps at reference module efficiency, module efficiency
	Electricity	Calculates total amount of electricity used for wafer, cell, and module production steps. Then calculates cost.	Amount of electricity kWh/kg for ingot solidification and kWh/W at reference cell efficiency for wafer slicing, cell, and module steps, module efficiency
	Metal Paste	Calculates cost of metal paste based on amount of aluminum and silver paste used and their respective costs.	Amount of aluminum and silver paste used per cell. Cost of aluminum and silver paste.
	Ingot Casting	Calculates cost of ingot casting based on Centrotherm estimates.	Reference cost at reference module efficiency, module efficiency
	Wire Sawing	Calculates cost of wafer sawing based on Centrotherm estimates.	Reference cost at reference module efficiency, module efficiency
	Glass	Calculates cost of glass based on GTM research estimates.	Reference cost at reference module area
	Frame	Calculates cost of module frames based on GTM research estimates.	Reference cost at reference module perimeter
	Encapsulant	Calculates cost of cell encapsulants based on GTM research estimates.	Reference cost at reference module area
	JB and Cable	Calculates cost of junction boxes and cables based on GTM research estimates.	Reference cost at reference module power
	Chemicals	Calculates cost of chemicals based on GTM research estimates.	Reference cost at reference module efficiency, module efficiency, types of gasses used
	Back Sheet	Calculates cost of back sheets based on GTM research estimates.	Reference cost at reference module area
	Yield Loss	Allocates cost of broken wafers, cells, and modules with breakage assumed to occur at the end of a processing step.	Mechanical yields for wafering, cell fabrication, module fabrication, and shipping process steps
	Ribbon	Calculates cost of tabbing ribbon based on GTM research estimates	Reference cost at reference module area
	Packaging	Calculate cost of boxing and wrapping.	Cardboard Cost
	Screens	Calculates cost of screens based on GTM research estimates.	Reference cost at reference module efficiency, module efficiency, economy of scale multiplier
	Shipping costs	Calculates total wattage of panels that can be placed in a container. Then calculates cost.	Shipping rate, module efficiency, number of modules per pallet
	Import Duty (FOB)	Calculates import duty based on product cost at port of shipment.	Import duty percentage

## Sheet: Results Summary
Results Summary
Feb 2012
Doug Powell
MIT Photovoltaic Research Laboratory
	Key Inputs and Assumptions
		Case
	Item	2012	2020 Adv. Concept	2020 LOS
	Module Efficiency [%]	14.5	20.5	17
	Cell Thickness [μm]	180	50	120
	Material Yield [-]	0.45	0.9	0.55
	Silicon Cost [$/kg]	40	25	25
	Labor [$/hr]	20.935	24.5125	24.5125
	Electricity Cost [$/kWh]	0.07	0.09	0.09
	Shipping Costs	0	0	0
	Outputs
		2012	2020 Adv. Concept	2020 LOS
	Silicon Use [g/Wp]	6.36465	0.612362	2.96109
		2012	2020 Adv. Concept	2020 LOS
		Cost [$/W]	Cost [$/W]	Cost [$/W]
	Depreciation	0.180815	0.147078	0.177359
	Silicon Feedstock	0.228724	0.0140434	0.0665073
	Labor	0.135795	0.05857	0.0934553
	Metal Paste	0.110813	0.053519	0.0467898
	Yield Loss	0.0830631	0.0257081	0.05379
	Glass	0.0732759	0.0467759	0.0564062
	Wire Sawing	0.0641161	0	0.0493553
	Frame	0.0599974	0	0.0461848
	Chemicals	0.0453989	0.0166979	0.0387226																									Error Bars
	Back Sheet	0.049569	0.0316425	0.0381572																									Series	Percent	High	Low
	Input Electricity	0.0513106	0.0281042	0.0502316																									2012	0.05	0.0646359	0.0646359
	Maintenance	0.0535645	0.0376778	0.0474178																									2020 Adv. Concept	0.1	0.0522662	0.0522662
	JB and Cable	0.04	0.0361	0.0361
	Encapsulant	0.0387931	0.0247637	0.0298621
	Ribbon	0.0323276	0	0.0248851
	Ingot Casting	0.0294411	0	0.0226631
	Screens	0.0126108	0	0.00970754
	Packaging	0.00310345	0.0019811	0.00238897
	Shipping costs	0	0	0
	Import Duty (FOB)	0	0	0
	Total	1.29272	0.522662	0.889983
		2012	2020 Adv. Concept	2020 LOS
		Cost [$/W]	Cost [$/W]	Cost [$/W]
	Wafer
	Silicon Feedstock	0.228724	0.0140434	0.0665073
	Depreciation	0.0899084	0.0731328	0.0881896
	Labor	0.0685695	0.0318461	0.0531728
	Wire Sawing	0.0641161	0	0.0493553
	Ingot Casting	0.0294411	0	0.0226631
	Maintenance	0.0266123	0.017892	0.0235584
	Yield Loss	0.0279774	0.00434112	0.0170498
	Input Electricity	0.0241989	0.00344856	0.0204998
	Cell
	Metal Paste	0.110813	0.053519	0.0467898
	Depreciation	0.0625392	0.0508703	0.0613436
	Chemicals	0.0453989	0.0166979	0.0387226
	Labor	0.0336125	0.013362	0.0201412
	Yield Loss	0.0303988	0.0112251	0.0196751
	Input Electricity	0.0236359	0.0214946	0.02592
	Maintenance	0.0179591	0.0131839	0.0158982
	Screens	0.0126108	0	0.00970754
	Module
	Glass	0.0732759	0.0467759	0.0564062
	Frame	0.0599974	0	0.0461848
	Back Sheet	0.049569	0.0316425	0.0381572
	JB and Cable	0.04	0.0361	0.0361
	Encapsulant	0.0387931	0.0247637	0.0298621
	Labor	0.0336125	0.013362	0.0201412
	Ribbon	0.0323276	0	0.0248851
	Depreciation	0.0283677	0.0230747	0.0278254
	Yield Loss	0.0246868	0.0101419	0.0170652
	Maintenance	0.00899316	0.00660194	0.00796116
	Input Electricity	0.00347586	0.00316098	0.00381176
	Packaging	0.00310345	0.0019811	0.00238897
	Other
	Shipping	0	0	0
	Import Duty (FOB)	0	0	0
	Yield Loss	0	0	0
	Total	1.29272	0.522662	0.889983
	Cost Waterfall
	Waterfall setup	2012	2020 LOS	Efficiency	Wafer	Mfg. and Module	2020 Adv. Concept
Wafer	Silicon Feedstock	0.228724	0.0665073				0.0140434
	Depreciation	0.0899084	0.0881896				0.0731328
	Labor	0.0685695	0.0531728				0.0318461
	Wire Sawing	0.0641161	0.0493553				0
	Ingot Casting	0.0294411	0.0226631				0
	Maintenance	0.0266123	0.0235584				0.017892
	Yield Loss	0.0279774	0.0170498				0.00434112
	Input Electricity	0.0241989	0.0204998				0.00344856
Cell	Metal Paste	0.110813	0.0467898				0.053519
	Depreciation	0.0625392	0.0613436				0.0508703
	Chemicals	0.0453989	0.0387226				0.0166979
	Labor	0.0336125	0.0201412				0.013362																						Error Bars
	Yield Loss	0.0303988	0.0196751				0.0112251																						Series	Percent	High	Low
	Input Electricity	0.0236359	0.02592				0.0214946																						2012	0.05	0.0646359	0.0646359
	Maintenance	0.0179591	0.0158982				0.0131839																						2020 LOS	0.1	0.0889983	0.0889983
	Screens	0.0126108	0.00970754				0
Module	Glass	0.0732759	0.0564062				0.0467759
	Frame	0.0599974	0.0461848				0
	Back Sheet	0.049569	0.0381572				0.0316425																						2020 Adv. Concept	0.1	0.0522662	0.0522662
	JB and Cable	0.04	0.0361				0.0361
	Encapsulant	0.0387931	0.0298621				0.0247637
	Labor	0.0336125	0.0201412				0.013362
	Ribbon	0.0323276	0.0248851				0
	Depreciation	0.0283677	0.0278254				0.0230747
	Yield Loss	0.0246868	0.0170652				0.0101419
	Maintenance	0.00899316	0.00796116				0.00660194
	Input Electricity	0.00347586	0.00381176				0.00316098
	Packaging	0.00310345	0.00238897				0.0019811
Other	Shipping costs	0	0				0
	Import Duty (FOB)	0	0				0
	Yield Loss	0	0				0
Waterfall Bars	Delta			0.146484	0.131197	0.0896404
	Bottom			0.743499	0.612302	0.522662
	Label			-0.146484	-0.131197	-0.0896404
Total		1.29272	0.889983	0	0	0	0.522662
								0	0	0	0	0	0

## Sheet: 2012 Domestic
Bottom-up cost estimate for standard mc-Si in 2012 with US manufacturing
Feb 2012
Doug Powell
MIT Photovoltaic Research Laboratory																			General Sensitivity Study
																			Figure showing % change in cost over % change in variable versus process inputs:
																			Baseline Cost	1.29272
																			For 2% change in variable
																			Factor	Cost [$/Wp] at 2% change in variable	Percent Change in module cost	Percent Change over Percent Change		Maxed Out Cost [$/Wp]		Maxed Delta [$/Wp]			Module cost Component [$/W]
																			Efficiency	1.26795	1.91586	0.957929		0.663912		0.628806
	Inputs																		Yield	1.27569	1.31739	0.658696		1.21125		0.0814633			0.0814633
	Item	Value	Unit																Silicon Feedstock	1.28814	0.353865	0.176933		1.06399		0.228724			0.228724
	Module Efficiency	14.5	[%]																Depreciation	1.28869	0.311236	0.155618		1.09155		0.20117			0.20117
	Cell Thickness	180	[μm]																Labor	1.29064	0.160567	0.0802833		1.18893		0.103784			0.103784
	Material Yield	0.45	[-]																Metal Paste	1.2909	0.140476	0.0702379		1.20192		0.0907978			0.0907978
	Contract Silicon Price	40	[$/kg]																Glass	1.29134	0.106477	0.0532383		1.2239		0.0688221			0.0688221
	Labor	20.935	[$/hr]																Wire Sawing	1.29144	0.0991958	0.0495979		1.2286		0.0641161			0.0641161
	Electricity Cost	0.07	[$/kwh]																Frame	1.29149	0.0950683	0.0475342		1.23127		0.0614483			0.0614483
	Shipping Costs	0	[$/container]																Maintenance	1.29165	0.0828711	0.0414356		1.23915		0.0535645			0.0535645
																			Back Sheet	1.29165	0.0823926	0.0411963		1.23946		0.0532552			0.0532552
																			Input Electricity	1.29171	0.07825	0.039125		1.24214		0.0505776			0.0505776
	Outputs																		JB and Cable	1.29197	0.0577536	0.0288768		1.25539		0.0373295			0.0373295
	Silicon Use	6.36465	[g/Wp]																Encapsulant	1.29198	0.057041	0.0285205		1.25585		0.036869			0.036869
																			Ribbon	1.29208	0.0494355	0.0247178		1.26076		0.0319531			0.0319531
	Cost Breakdown								Allotment [$/W]				Allotment Specific Modifier [$/W]						Ingot Casting	1.29213	0.0455491	0.0227746		1.26328		0.0294411			0.0294411
	Item	Cost [$/cell]	Adder [$/W]	Adder [$/cell]	Tech Multiplier	Learning Multiplier	Cost [$/W]	Percentage	Wafer	Cell	Module	Other	Wafer	Cell	Module	Other			Screens	1.29247	0.0195105	0.00975526		1.28011		0.0126108			0.0126108
	Silicon Feedstock	0.906857			1	1	0.228724	0.176933	0.228724										Packaging	1.29266	0.00480143	0.00240072		1.28961		0.00310345			0.00310345
	Depreciation		NA	NA	1	1	0.180815	0.139872	0.0899084	0.0625392	0.0283677
	Maintenance		NA	NA	1	1	0.0535645	0.0414356	0.0266123	0.0179591	0.00899316
	Labor		NA	NA	1	1	0.135795	0.105046	0.0685695	0.0336125	0.0336125
	Input Electricity		NA	NA	1	1	0.0513106	0.039692	0.0241989	0.0236359	0.00347586
	Metal Paste	0.439357			1	1	0.110813	0.0857208		0.110813
	Ingot Casting				1	1	0.0294411	0.0227746	0.0294411
	Wire Sawing				1	1	0.0641161	0.0495979	0.0641161
	Glass				1	1	0.0732759	0.0566836			0.0732759
	Frame				1	1	0.0599974	0.0464118			0.0599974
	Encapsulant				1	1	0.0387931	0.0300089			0.0387931
	JB and Cable				1	1	0.04	0.0309426			0.04
	Chemicals	0.18			1	1	0.0453989	0.0351189		0.0453989
	Back Sheet				1	1	0.049569	0.0383448			0.049569
	Yield Loss		NA	NA	1	1	0.0830631	0.0642546	0.0279774	0.0303988	0.0246868	0
	Ribbon				1	1	0.0323276	0.0250075			0.0323276
	Packaging				1	1	0.00310345	0.00240072			0.00310345
	Screens	0.05			1	1	0.0126108	0.00975526		0.0126108
	Shipping costs				1	1	0	0				0
	Import Duty (FOB)				1	1	0	0				0
	Total						1.29272	1	0.559548	0.336968	0.396202	0
	Calculations
	Power
	Number of Cells per Module	72	[cells/module]
	Area Utilization	89	[%]
	Area of module	1.96876	[m^2/module]
	Power Out Per Module	285.469	[W/module]
	Learning Multiplier
	Number of Doublings	0	[-]
	Drop per double	5	[%]
	Total multiplier	1	[-]
	Silicon Feedstock
	Silicon Density	2329	[kg/m^3]
	Mass of Si per Cell without breakage	0.0226714	[kg/cell]
	Dollars per Cell	0.906857	[$/cell]
	Depreciation
	Capacity	347	[MW]
	Reference Module Efficiency	14.4	[-]
	Reference Plant Output	2.40972e+06	[m^2/yr]
	Equipment Depreciation Period	5	[yrs]
	Facility Depreciation Period	39	[yrs]
		Floor space [m^2]	Total Investment [$]	Equipment Payment [$/yr]	Facility Payment [$/yr]	Payment [$/m^2 Product]	Payment [$/W]	Individual Investment [MM/MW]
	Ingot + Wafer	46500	185971815	3.0565e+07	849923	13.0367	0.0899084	0.535942
	Cell	18000	125501400	21374100	477715	9.06819	0.0625392	0.361676
	Module	20000	6.28459e+07	9521190	390769	4.11332	0.0283677	0.181112
		Total [MM/MW]	1.07873			Total [$/W]	0.180815
	Maintenance
	Amount initial investment per year	0.05	[-]
		Payment [$/yr]	Payment [$/m^2 Product]	Payment [$/W]
	Ingot + Wafer	9.29859e+06	3.85878	0.0266123
	Cell	6275070	2.60406	0.0179591
	Module	3.1423e+06	1.30401	0.00899316
			Total [$/W]	0.0535645
	Wire Sawing
	Payment at reference plant output	22402800	[$/yr]
	Payment	9.29684	[$/m^2 Product]
	Payment	0.0641161	[$/W]
	Ingot Casting
	Payment at reference plant output	10287000	[$/yr]
	Payment	4.26896	[$/m^2 Product]
	Payment	0.0294411	[$/W]
	Labor
	Reference Plant Output	347	[MW/yr]
	Reference Module Efficiency	14.4	[-]
	Reference Power per Cell	3.50438	[W]
	Plant Output	2.40972e+06	[m^2/yr]
	People for Ingot	360	[people]
	People for Wafer	150	[people]
	People for Cell	250	[people]
	People for Module	250	[people]
	People per Watt Output	2.91066	[People/MW]
	Hours per year per Person	2244	[hrs/yr]
	Wafer labor hours per area	0.474926	[people hours/m^2]
	Cell labor hours per area	0.232807	[people hours/m^2]
	Module labor hours per area	0.232807	[people hours/m^2]
	Wafer labor cost per area	9.94258	[$/m^2]
	Cell labor cost per area	4.87381	[$/m^2]
	Module labor cost per area	4.87381	[$/m^2]
	Actual Cell output per m^2	145	[W/m^2]
	Wafer labor cost	0.0685695	[$/W]
	Cell labor cost	0.0336125	[$/W]
	Module labor cost	0.0336125	[$/W]
	Labor Cost	0.135795	[$/W]
	Input Electricity
	Reference Module Efficiency	14.4	[%]
	Ingot Solidification Need at Ref Efficiency	25.9	[kWh/kg]
	Ingot Solidification Need at Ref Efficiency	0.148099	[kWh/W]
	Wafering Need at Ref Efficiency	0.2	[kWh/W]
	Cell Need at Ref Efficiency	0.34	[kWh/W]
	Module Need at Ref Efficiency	0.05	[kWh/W]
	Wafer Electricity Cost	0.0241989	[$/w]
	Cell Electricity Cost	0.0236359	[$/w]
	Module Electricity Cost	0.00347586	[$/w]
	Total Energy Cost	0.0513106	[$/w]
	Yield Loss
	Wafering Yield	0.95	[-]
	Cell Process Yield	0.965	[-]
	Module Process Yield	0.98	[-]
	Shipping Yield	1	[-]
	Value during wafer breakage	0.53157	[$/W]
	Value during cell breakage	0.838139	[$/W]
	Value during module breakage	1.20966	[$/W]
	Value during shipping	1.20966	[$/W]
	Wafer Yield Loss	0.0279774	[$/W]
	Cell Yield Loss	0.0303988	[$/W]
	Module Yield Loss	0.0246868	[$/W]
	Shipping Yield Loss	0	[$/W]
	Total Yield Loss	0.0830631	[$/W]
	Packaging
	Cardboard cost	0.15	[$/m^2]
	Packaging	0.88594	[$/Module]
	Cost of Packaging	0.00310345	[$/W]
	Metal Paste
	Cost of Silver Paste	1286.03	[$/kg]
	Silver Paste utilization	0.225	[g/cell]
	Cost of Silver Paste	0.289357	[$/cell]
	Cost of Al Paste	150	[$/kg]
	Al Paste utilization	1	[g/cell]
	Cost of Al Paste	0.15	[$/cell]
	Cost of Metal Paste	0.439357	[$/cell]
	Other Costs
	Reference Cell number	60	[-]
	Reference Module Area	1.6	[m^2]
		[$/Module] at Reference Area	[$/Module] at actual area	Cost [$/W]
	Frame Cost	15	17.1274	0.0599974
	Backsheet Cost	11.5	14.1504	0.049569
	Encapsulant Cost	9	11.0742	0.0387931
	Glass Cost	17	20.918	0.0732759
	JB and Cable	10		0.04
	Ribbon	7.5	9.22854	0.0323276
	Screen Prints per cell	4	[prints/cell]
	Lifetime of Screen	8000	[prints]
	Cost of Screen	100	[$]
	Cost of Screen	0.05	[$/cell]
	Shipping Costs from China to US
	Watts in container	141120	[W/container]
	Shipping Costs	0	[$/container]
	Shipping Cost	0	[$/w]
	Import Duty (FOB)
	Is Imported	0	[-]
	Import Duty	0	[$/w]

## Sheet: 2020 LOS Domestic
Bottom-up cost estimate for line of sight innovation in 2020 with US manufacturing
Feb 2012
Doug Powell
MIT Photovoltaic Research Laboratory
	Inputs
	Item	Value	Unit
	Module Efficiency	17	[%]
	Cell Thickness	120	[μm]
	Material Yield	0.55	[-]
	Contract Silicon Price	25	[$/kg]
	Labor	24.5125	[$/hr]
	Electricity Cost	0.09	[$/kwh]
	Shipping Costs	0	[$/container]
	Outputs
	Silicon Use	2.96109	[g/Wp]
	Cost Breakdown								Allotment [$/W]				Allotment Specific Modifier [$/W]
	Item	Cost [$/cell]	Adder [$/W]	Adder [$/cell]	Tech Multiplier	Learning Multiplier	Cost [$/W]	Percentage	Wafer	Cell	Module	Other	Wafer	Cell	Module	Other
	Silicon Feedstock	0.309156			1	1	0.0665073	0.0747287	0.0665073
	Depreciation		NA	NA	1	1	0.177359	0.199283	0.0881896	0.0613436	0.0278254
	Maintenance		NA	NA	1	0.9025	0.0474178	0.0532794	0.0235584	0.0158982	0.00796116
	Labor		NA	NA	1	1	0.0934553	0.105008	0.0531728	0.0201412	0.0201412
	Input Electricity		NA	NA	1	1	0.0502316	0.056441	0.0204998	0.02592	0.00381176
	Metal Paste	0.2175			1	1	0.0467898	0.0525738		0.0467898
	Ingot Casting				1	0.9025	0.0226631	0.0254647	0.0226631
	Wire Sawing				1	0.9025	0.0493553	0.0554564	0.0493553
	Glass				1	0.9025	0.0564062	0.063379			0.0564062
	Frame				1	0.9025	0.0461848	0.051894			0.0461848
	Encapsulant				1	0.9025	0.0298621	0.0335536			0.0298621
	JB and Cable				1	0.9025	0.0361	0.0405626			0.0361
	Chemicals	0.18			1	1	0.0387226	0.0435093		0.0387226
	Back Sheet				1	0.9025	0.0381572	0.042874			0.0381572
	Yield Loss		NA	NA	1	1	0.05379	0.0604394	0.0170498	0.0196751	0.0170652	0
	Ribbon				1	0.9025	0.0248851	0.0279613			0.0248851
	Packaging				1	0.9025	0.00238897	0.00268429			0.00238897
	Screens	0.05			1	0.9025	0.00970754	0.0109076		0.00970754
	Shipping costs				1	1	0	0				0
	Import Duty (FOB)				1	1	0	0				0
	Total						0.889983	1	0.340996	0.238198	0.310789	0
	Calculations
	Power
	Number of Cells per Module	72	[cells/module]
	Area Utilization	89	[%]
	Area of module	1.96876	[m^2/module]
	Power Out Per Module	334.688	[W/module]
	Learning Multiplier
	Number of Doublings	2	[-]
	Drop per double	5	[%]
	Total multiplier	0.9025	[-]
	Silicon Feedstock
	Silicon Density	2329	[kg/m^3]
	Mass of Si per Cell without breakage	0.0123662	[kg/cell]
	Dollars per Cell	0.309156	[$/cell]
	Depreciation
	Capacity	347	[MW]
	Reference Module Efficiency	14.4	[-]
	Reference Plant Output	2.40972e+06	[m^2/yr]
	Equipment Depreciation Period	5	[yrs]
	Facility Depreciation Period	39	[yrs]
		Floor space [m^2]	Total Investment [$]	Equipment Payment [$/yr]	Facility Payment [$/yr]	Payment [$/m^2 Product]	Payment [$/W]	Individual Investment [MM/MW]
	Ingot + Wafer	46500	2.13868e+08	3.51497e+07	977412	14.9922	0.0881896	0.616333
	Cell	18000	144326610	2.45802e+07	549373	10.4284	0.0613436	0.415927
	Module	20000	7.22728e+07	1.09494e+07	449385	4.73032	0.0278254	0.208279
		Total [MM/MW]	1.24054			Total [$/W]	0.177359
	Maintenance
	Amount initial investment per year	0.05	[-]
		Payment [$/yr]	Payment [$/m^2 Product]	Payment [$/W]
	Ingot + Wafer	1.06934e+07	4.4376	0.0261035
	Cell	7.21633e+06	2.99467	0.0176157
	Module	3.61364e+06	1.49961	0.00882123
			Total [$/W]	0.0525405
	Wire Sawing
	Payment at reference plant output	22402800	[$/yr]
	Payment	9.29684	[$/m^2 Product]
	Payment	0.0546873	[$/W]
	Ingot Casting
	Payment at reference plant output	10287000	[$/yr]
	Payment	4.26896	[$/m^2 Product]
	Payment	0.0251115	[$/W]
	Labor
	Reference Plant Output	347	[MW/yr]
	Reference Module Efficiency	14.4	[-]
	Reference Power per Cell	3.50438	[W]
	Plant Output	2.40972e+06	[m^2/yr]
	People for Ingot	306	[people]
	People for Wafer	90	[people]
	People for Cell	150	[people]
	People for Module	150	[people]
	People per Watt Output	2.00576	[People/MW]
	Hours per year per Person	2244	[hrs/yr]
	Wafer labor hours per area	0.368766	[people hours/m^2]
	Cell labor hours per area	0.139684	[people hours/m^2]
	Module labor hours per area	0.139684	[people hours/m^2]
	Wafer labor cost per area	9.03938	[$/m^2]
	Cell labor cost per area	3.42401	[$/m^2]
	Module labor cost per area	3.42401	[$/m^2]
	Actual Cell output per m^2	170	[W/m^2]
	Wafer labor cost	0.0531728	[$/W]
	Cell labor cost	0.0201412	[$/W]
	Module labor cost	0.0201412	[$/W]
	Labor Cost	0.0934553	[$/W]
	Input Electricity
	Reference Module Efficiency	14.4	[%]
	Ingot Solidification Need at Ref Efficiency	25.9	[kWh/kg]
	Ingot Solidification Need at Ref Efficiency	0.0689015	[kWh/W]
	Wafering Need at Ref Efficiency	0.2	[kWh/W]
	Cell Need at Ref Efficiency	0.34	[kWh/W]
	Module Need at Ref Efficiency	0.05	[kWh/W]
	Wafer Electricity Cost	0.0204998	[$/w]
	Cell Electricity Cost	0.02592	[$/w]
	Module Electricity Cost	0.00381176	[$/w]
	Total Energy Cost	0.0502316	[$/w]
	Yield Loss
	Wafering Yield	0.95	[-]
	Cell Process Yield	0.965	[-]
	Module Process Yield	0.98	[-]
	Shipping Yield	1	[-]
	Value during wafer breakage	0.323946	[$/W]
	Value during cell breakage	0.542469	[$/W]
	Value during module breakage	0.836193	[$/W]
	Value during shipping	0.836193	[$/W]
	Wafer Yield Loss	0.0170498	[$/W]
	Cell Yield Loss	0.0196751	[$/W]
	Module Yield Loss	0.0170652	[$/W]
	Shipping Yield Loss	0	[$/W]
	Total Yield Loss	0.05379	[$/W]
	Packaging
	Cardboard cost	0.15	[$/m^2]
	Packaging	0.88594	[$/Module]
	Cost of Packaging	0.00264706	[$/W]
	Metal Paste
	Cost of Silver Paste	300	[$/kg]
	Silver Paste utilization	0.225	[g/cell]
	Cost of Silver Paste	0.0675	[$/cell]
	Cost of Al Paste	150	[$/kg]
	Al Paste utilization	1	[g/cell]
	Cost of Al Paste	0.15	[$/cell]
	Cost of Metal Paste	0.2175	[$/cell]
	Other Costs
	Reference Cell number	60	[-]
	Reference Module Area	1.6	[m^2]
		[$/Module] at Reference Area	[$/Module] at actual area	Cost [$/W]
	Frame Cost	15	17.1274	0.0511743
	Backsheet Cost	11.5	14.1504	0.0422794
	Encapsulant Cost	9	11.0742	0.0330882
	Glass Cost	17	20.918	0.0625
	JB and Cable	10		0.04
	Ribbon	7.5	9.22854	0.0275735
	Screen Prints per cell	4	[prints/cell]
	Lifetime of Screen	8000	[prints]
	Cost of Screen	100	[$]
	Cost of Screen	0.05	[$/cell]
	Shipping Costs from China to US
	Watts in container	141120	[W/container]
	Shipping Costs	0	[$/container]
	Shipping Cost	0	[$/w]
	Import Duty (FOB)
	Is Imported	0	[-]
	Import Duty	0	[$/w]

## Sheet: 2020 Advanced Domestic
Bottom-up cost estimate for standard mc-Si in 2012 with US manufacturing
Feb 2012
Doug Powell
MIT Photovoltaic Research Laboratory
	Inputs
	Item	Value	Unit
	Module Efficiency	20.5	[%]
	Cell Thickness	50	[μm]
	Material Yield	0.9	[-]
	Contract Silicon Price	25	[$/kg]
	Labor	24.5125	[$/hr]
	Electricity Cost	0.09	[$/kwh]
	Shipping Costs	0	[$/container]
	Outputs
	Silicon Use	0.612362	[g/Wp]
	Cost Breakdown								Allotment [$/W]				Allotment Specific Modifier [$/W]
	Item	Cost [$/cell]	Adder [$/W]	Adder [$/cell]	Tech Multiplier	Learning Multiplier	Cost [$/W]	Percentage	Wafer	Cell	Module	Other	Wafer	Cell	Module	Other
	Silicon Feedstock	0.0787202			1	1	0.0140434	0.0268691	0.0140434
	Depreciation		NA	NA	1	1	0.147078	0.281402	0.0731328	0.0508703	0.0230747
	Maintenance		NA	NA	1	0.9025	0.0376778	0.0720883	0.017892	0.0131839	0.00660194
	Labor		NA	NA	1	1	0.05857	0.112061	0.0318461	0.013362	0.013362
	Input Electricity		NA	NA	1	1	0.0281042	0.0537713	0.00344856	0.0214946	0.00316098
	Metal Paste	0.3			1	1	0.053519	0.102397		0.053519
	Ingot Casting				0	0.9025	0	0	0
	Wire Sawing				0	0.9025	0	0	0
	Glass				1	0.9025	0.0467759	0.0894956			0.0467759
	Frame				0	0.9025	0	0			0
	Encapsulant				1	0.9025	0.0247637	0.04738			0.0247637
	JB and Cable				1	0.9025	0.0361	0.0690695			0.0361
	Chemicals	0.18			0.52	1	0.0166979	0.0319479		0.0166979
	Back Sheet				1	0.9025	0.0316425	0.0605411			0.0316425
	Yield Loss		NA	NA	1	1	0.0257081	0.0491869	0.00434112	0.0112251	0.0101419	0
	Ribbon				0	1	0	0			0
	Packaging				1	0.9025	0.0019811	0.0037904			0.0019811
	Screens	0.05			0	1	0	0		0
	Shipping costs				1	1	0	0				0
	Import Duty (FOB)				1	1	0	0				0
	Total						0.522662	1	0.144704	0.180353	0.197605	0
	Calculations
	Power
	Number of Cells per Module	72	[cells/module]
	Area Utilization	89	[%]
	Area of module	1.96876	[m^2/module]
	Power Out Per Module	403.595	[W/module]
	Learning Multiplier
	Number of Doublings	2	[-]
	Drop per double	5	[%]
	Total multiplier	0.9025	[-]
	Silicon Feedstock
	Silicon Density	2329	[kg/m^3]
	Mass of Si per Cell without breakage	0.00314881	[kg/cell]
	Dollars per Cell	0.0787202	[$/cell]
	Depreciation
	Capacity	347	[MW]
	Reference Module Efficiency	14.4	[-]
	Reference Plant Output	2.40972e+06	[m^2/yr]
	Equipment Depreciation Period	5	[yrs]
	Facility Depreciation Period	39	[yrs]
		Floor space [m^2]	Investment [$]	Equipment Payment [$/yr]	Facility Payment [$/yr]	Payment [$/m^2 Product]	Payment [$/W]	Individual Investment [MM/MW]
	Ingot + Wafer	46500	1.95868e+08	3.51497e+07	977412	14.9922	0.0731328	0.56446
	Cell	18000	144326610	2.45802e+07	549373	10.4284	0.0508703	0.415927
	Module	20000	7.22728e+07	1.09494e+07	449385	4.73032	0.0230747	0.208279
		Total [MM/MW]	1.18867			Total [$/W]	0.147078
	Maintenance
	Amount initial investment per year	0.05	[-]
		Payment [$/yr]	Payment [$/m^2 Product]	Payment [$/W]
	Ingot + Wafer	9.79338e+06	4.06411	0.0198249
	Cell	7.21633e+06	2.99467	0.0146082
	Module	3.61364e+06	1.49961	0.00731517
			Total [$/W]	0.0417483
	Wire Sawing
	Payment at reference plant output	22402800	[$/yr]
	Payment	9.29684	[$/m^2 Product]
	Payment	0.0453504	[$/W]
	Ingot Casting
	Payment at reference plant output	10287000	[$/yr]
	Payment	4.26896	[$/m^2 Product]
	Payment	0.0208242	[$/W]
	Labor
	Reference Plant Output	347	[MW/yr]
	Reference Module Efficiency	14.4	[-]
	Reference Power per Cell	3.50438	[W]
	Plant Output	2.40972e+06	[m^2/yr]
	People for Ingot	196	[people]
	People for Wafer	90	[people]
	People for Cell	120	[people]
	People for Module	120	[people]
	People per Watt Output	1.51585	[People/MW]
	Hours per year per Person	2244	[hrs/yr]
	Wafer labor hours per area	0.266331	[people hours/m^2]
	Cell labor hours per area	0.111747	[people hours/m^2]
	Module labor hours per area	0.111747	[people hours/m^2]
	Wafer labor cost per area	6.52844	[$/m^2]
	Cell labor cost per area	2.73921	[$/m^2]
	Module labor cost per area	2.73921	[$/m^2]
	Actual Cell output per m^2	205	[W/m^2]
	Wafer labor cost	0.0318461	[$/W]
	Cell labor cost	0.013362	[$/W]
	Module labor cost	0.013362	[$/W]
	Labor Cost	0.05857	[$/W]
	Input Electricity
	Reference Module Efficiency	14.4	[%]
	Ingot Solidification Need at Ref Efficiency	25.9	[kWh/kg]
	Ingot Solidification Need at Ref Efficiency	0.014549	[kWh/W]
	Wafering Need at Ref Efficiency	0.04	[kWh/W]
	Cell Need at Ref Efficiency	0.34	[kWh/W]
	Module Need at Ref Efficiency	0.05	[kWh/W]
	Wafer Electricity Cost	0.00344856	[$/w]
	Cell Electricity Cost	0.0214946	[$/w]
	Module Electricity Cost	0.00316098	[$/w]
	Total Energy Cost	0.0281042	[$/w]
	Yield Loss
	Wafering Yield	0.97	[-]
	Cell Process Yield	0.965	[-]
	Module Process Yield	0.98	[-]
	Shipping Yield	1	[-]
	Value during wafer breakage	0.140363	[$/W]
	Value during cell breakage	0.309491	[$/W]
	Value during module breakage	0.496954	[$/W]
	Value during shipping	0.496954	[$/W]
	Wafer Yield Loss	0.00434112	[$/W]
	Cell Yield Loss	0.0112251	[$/W]
	Module Yield Loss	0.0101419	[$/W]
	Shipping Yield Loss	0	[$/W]
	Total Yield Loss	0.0257081	[$/W]
	Packaging
	Cardboard cost	0.15	[$/m^2]
	Packaging	0.88594	[$/Module]
	Cost of Packaging	0.00219512	[$/W]
	Metal Paste
	Cost of Silver Paste	300	[$/kg]
	Silver Paste utilization	0	[g/cell]
	Cost of Silver Paste	0	[$/cell]
	Cost of Al Paste	300	[$/kg]
	Al Paste utilization	1	[g/cell]
	Cost of Al Paste	0.3	[$/cell]
	Cost of Metal Paste	0.3	[$/cell]
	Other Costs
	Reference Cell number	60	[-]
	Reference Module Area	1.6	[m^2]
		[$/Module] at Reference Area	[$/Module] at actual area	Cost [$/W]
	Frame Cost	15	17.1274	0.0424372
	Backsheet Cost	11.5	14.1504	0.035061
	Encapsulant Cost	9	11.0742	0.027439
	Glass Cost	17	20.918	0.0518293
	JB and Cable	10		0.04
	Ribbon	7.5	9.22854	0.0228659
	Screen Prints per cell	4	[prints/cell]
	Lifetime of Screen	8000	[prints]
	Cost of Screen	100	[$]
	Cost of Screen	0.05	[$/cell]
	Shipping Costs from China to US
	Watts in container	141120	[W/container]
	Shipping Costs	0	[$/container]
	Shipping Cost	0	[$/w]
	Import Duty (FOB)
	Is Imported	0	[-]
	Import Duty	0	[$/w]

## Sheet: 2020 Waferfall 1
Waterfall Step 1: High efficiency
Feb 2012
Doug Powell
MIT Photovoltaic Research Laboratory
	Inputs
	Item	Value	Unit
	Module Efficiency	20.5	[%]
	Cell Thickness	120	[μm]
	Material Yield	0.55	[-]
	Contract Silicon Price	25	[$/kg]
	Labor	24.5125	[$/hr]
	Electricity Cost	0.09	[$/kwh]
	Shipping Costs	0	[$/container]
	Outputs
	Silicon Use	2.45554	[g/Wp]
	Cost Breakdown								Allotment [$/W]				Allotment Specific Modifier [$/W]
	Item	Cost [$/cell]	Adder [$/W]	Adder [$/cell]	Tech Multiplier	Learning Multiplier	Cost [$/W]	Percentage	Wafer	Cell	Module	Other	Wafer	Cell	Module	Other
	Silicon Feedstock	0.309156			1	1	0.0551524	0.0741795	0.0551524
	Depreciation		NA	NA	1	1	0.147078	0.197819	0.0731328	0.0508703	0.0230747
	Maintenance		NA	NA	1	0.9025	0.0393221	0.0528878	0.0195363	0.0131839	0.00660194
	Labor		NA	NA	1	1	0.0774995	0.104236	0.0440945	0.0167025	0.0167025
	Input Electricity		NA	NA	1	1	0.0409117	0.0550259	0.0162561	0.0214946	0.00316098
	Metal Paste	0.2175			1	1	0.0388013	0.0521874		0.0388013
	Ingot Casting				1	0.9025	0.0187938	0.0252775	0.0187938
	Wire Sawing				1	0.9025	0.0409288	0.0550488	0.0409288
	Glass				1	0.9025	0.0467759	0.0629132			0.0467759
	Frame				1	0.9025	0.0382996	0.0515126			0.0382996
	Encapsulant				1	0.9025	0.0247637	0.033307			0.0247637
	JB and Cable				1	0.9025	0.0361	0.0485542			0.0361
	Chemicals	0.18			1	1	0.0321114	0.0431896		0.0321114
	Back Sheet				1	0.9025	0.0316425	0.0425589			0.0316425
	Yield Loss		NA	NA	1	1	0.0446509	0.060055	0.0140997	0.0162889	0.0142622	0
	Ribbon				1	0.9025	0.0206364	0.0277558			0.0206364
	Packaging				1	0.9025	0.0019811	0.00266456			0.0019811
	Screens	0.05			1	0.9025	0.00805015	0.0108274		0.00805015
	Shipping costs				1	1	0	0				0
	Import Duty (FOB)				1	1	0	0				0
	Total						0.743499	1	0.281994	0.197503	0.264002	0
	Calculations
	Power
	Number of Cells per Module	72	[cells/module]
	Area Utilization	89	[%]
	Area of module	1.96876	[m^2/module]
	Power Out Per Module	403.595	[W/module]
	Learning Multiplier
	Number of Doublings	2	[-]
	Drop per double	5	[%]
	Total multiplier	0.9025	[-]
	Silicon Feedstock
	Silicon Density	2329	[kg/m^3]
	Mass of Si per Cell without breakage	0.0123662	[kg/cell]
	Dollars per Cell	0.309156	[$/cell]
	Depreciation
	Capacity	347	[MW]
	Reference Module Efficiency	14.4	[-]
	Reference Plant Output	2.40972e+06	[m^2/yr]
	Equipment Depreciation Period	5	[yrs]
	Facility Depreciation Period	39	[yrs]
		Floor space [m^2]	Investment [$]	Equipment Payment [$/yr]	Facility Payment [$/yr]	Payment [$/m^2 Product]	Payment [$/W]	Individual Investment [MM/MW]
	Ingot + Wafer	46500	2.13868e+08	3.51497e+07	977412	14.9922	0.0731328	0.616333
	Cell	18000	144326610	2.45802e+07	549373	10.4284	0.0508703	0.415927
	Module	20000	7.22728e+07	1.09494e+07	449385	4.73032	0.0230747	0.208279
		Total [MM/MW]	1.24054			Total [$/W]	0.147078
	Maintenance
	Amount initial investment per year	0.05	[-]
		Payment [$/yr]	Payment [$/m^2 Product]	Payment [$/W]
	Ingot + Wafer	1.06934e+07	4.4376	0.0216468
	Cell	7.21633e+06	2.99467	0.0146082
	Module	3.61364e+06	1.49961	0.00731517
			Total [$/W]	0.0435702
	Wire Sawing
	Payment at reference plant output	22402800	[$/yr]
	Payment	9.29684	[$/m^2 Product]
	Payment	0.0453504	[$/W]
	Ingot Casting
	Payment at reference plant output	10287000	[$/yr]
	Payment	4.26896	[$/m^2 Product]
	Payment	0.0208242	[$/W]
	Labor
	Reference Plant Output	347	[MW/yr]
	Reference Module Efficiency	14.4	[-]
	Reference Power per Cell	3.50438	[W]
	Plant Output	2.40972e+06	[m^2/yr]
	People for Ingot	306	[people]
	People for Wafer	90	[people]
	People for Cell	150	[people]
	People for Module	150	[people]
	People per Watt Output	2.00576	[People/MW]
	Hours per year per Person	2244	[hrs/yr]
	Wafer labor hours per area	0.368766	[people hours/m^2]
	Cell labor hours per area	0.139684	[people hours/m^2]
	Module labor hours per area	0.139684	[people hours/m^2]
	Wafer labor cost per area	9.03938	[$/m^2]
	Cell labor cost per area	3.42401	[$/m^2]
	Module labor cost per area	3.42401	[$/m^2]
	Actual Cell output per m^2	205	[W/m^2]
	Wafer labor cost	0.0440945	[$/W]
	Cell labor cost	0.0167025	[$/W]
	Module labor cost	0.0167025	[$/W]
	Labor Cost	0.0774995	[$/W]
	Input Electricity
	Reference Module Efficiency	14.4	[%]
	Ingot Solidification Need at Ref Efficiency	25.9	[kWh/kg]
	Ingot Solidification Need at Ref Efficiency	0.0571379	[kWh/W]
	Wafering Need at Ref Efficiency	0.2	[kWh/W]
	Cell Need at Ref Efficiency	0.34	[kWh/W]
	Module Need at Ref Efficiency	0.05	[kWh/W]
	Wafer Electricity Cost	0.0162561	[$/w]
	Cell Electricity Cost	0.0214946	[$/w]
	Module Electricity Cost	0.00316098	[$/w]
	Total Energy Cost	0.0409117	[$/w]
	Yield Loss
	Wafering Yield	0.95	[-]
	Cell Process Yield	0.965	[-]
	Module Process Yield	0.98	[-]
	Shipping Yield	1	[-]
	Value during wafer breakage	0.267895	[$/W]
	Value during cell breakage	0.449109	[$/W]
	Value during module breakage	0.698848	[$/W]
	Value during shipping	0.698848	[$/W]
	Wafer Yield Loss	0.0140997	[$/W]
	Cell Yield Loss	0.0162889	[$/W]
	Module Yield Loss	0.0142622	[$/W]
	Shipping Yield Loss	0	[$/W]
	Total Yield Loss	0.0446509	[$/W]
	Packaging
	Cardboard cost	0.15	[$/m^2]
	Packaging	0.88594	[$/Module]
	Cost of Packaging	0.00219512	[$/W]
	Metal Paste
	Cost of Silver Paste	300	[$/kg]
	Silver Paste utilization	0.225	[g/cell]
	Cost of Silver Paste	0.0675	[$/cell]
	Cost of Al Paste	150	[$/kg]
	Al Paste utilization	1	[g/cell]
	Cost of Al Paste	0.15	[$/cell]
	Cost of Metal Paste	0.2175	[$/cell]
	Other Costs
	Reference Cell number	60	[-]
	Reference Module Area	1.6	[m^2]
		[$/Module] at Reference Area	[$/Module] at actual area	Cost [$/W]
	Frame Cost	15	17.1274	0.0424372
	Backsheet Cost	11.5	14.1504	0.035061
	Encapsulant Cost	9	11.0742	0.027439
	Glass Cost	17	20.918	0.0518293
	JB and Cable	10		0.04
	Ribbon	7.5	9.22854	0.0228659
	Screen Prints per cell	4	[prints/cell]
	Lifetime of Screen	8000	[prints]
	Cost of Screen	100	[$]
	Cost of Screen	0.05	[$/cell]
	Shipping Costs from China to US
	Watts in container	141120	[W/container]
	Shipping Costs	0	[$/container]
	Shipping Cost	0	[$/w]
	Import Duty (FOB)
	Is Imported	0	[-]
	Import Duty	0	[$/w]

## Sheet: 2020 Waferfall 2
Waterfall Step 2: Thin Kerfless Wafers
Feb 2012
Doug Powell
MIT Photovoltaic Research Laboratory
	Inputs
	Item	Value	Unit
	Module Efficiency	20.5	[%]
	Cell Thickness	50	[μm]
	Material Yield	0.9	[-]
	Contract Silicon Price	25	[$/kg]
	Labor	24.5125	[$/hr]
	Electricity Cost	0.09	[$/kwh]
	Shipping Costs	0	[$/container]
	Outputs
	Silicon Use	0.612362	[g/Wp]
	Cost Breakdown								Allotment [$/W]				Allotment Specific Modifier [$/W]
	Item	Cost [$/cell]	Adder [$/W]	Adder [$/cell]	Tech Multiplier	Learning Multiplier	Cost [$/W]	Percentage	Wafer	Cell	Module	Other	Wafer	Cell	Module	Other
	Silicon Feedstock	0.0787202			1	1	0.0140434	0.0229355	0.0140434
	Depreciation		NA	NA	1	1	0.147078	0.240205	0.0731328	0.0508703	0.0230747
	Maintenance		NA	NA	1	0.9025	0.0376778	0.0615347	0.017892	0.0131839	0.00660194
	Labor		NA	NA	1	1	0.0774995	0.126571	0.0440945	0.0167025	0.0167025
	Input Electricity		NA	NA	1	1	0.0281042	0.0458992	0.00344856	0.0214946	0.00316098
	Metal Paste	0.2175			1	1	0.0388013	0.0633695		0.0388013
	Ingot Casting				0	0.9025	0	0	0
	Wire Sawing				0	0.9025	0	0	0
	Glass				1	0.9025	0.0467759	0.0763935			0.0467759
	Frame				1	0.9025	0.0382996	0.0625501			0.0382996
	Encapsulant				1	0.9025	0.0247637	0.0404436			0.0247637
	JB and Cable				1	0.9025	0.0361	0.0589578			0.0361
	Chemicals	0.18			1	1	0.0321114	0.0524438		0.0321114
	Back Sheet				1	0.9025	0.0316425	0.051678			0.0316425
	Yield Loss		NA	NA	1	1	0.0287371	0.0469329	0.00471994	0.0121077	0.0119095	0
	Ribbon				1	0.9025	0.0206364	0.033703			0.0206364
	Packaging				1	0.9025	0.0019811	0.00323549			0.0019811
	Screens	0.05			1	0.9025	0.00805015	0.0131474		0.00805015
	Shipping costs				1	1	0	0				0
	Import Duty (FOB)				1	1	0	0				0
	Total						0.612302	1	0.157331	0.193322	0.261649	0
	Calculations
	Power
	Number of Cells per Module	72	[cells/module]
	Area Utilization	89	[%]
	Area of module	1.96876	[m^2/module]
	Power Out Per Module	403.595	[W/module]
	Learning Multiplier
	Number of Doublings	2	[-]
	Drop per double	5	[%]
	Total multiplier	0.9025	[-]
	Silicon Feedstock
	Silicon Density	2329	[kg/m^3]
	Mass of Si per Cell without breakage	0.00314881	[kg/cell]
	Dollars per Cell	0.0787202	[$/cell]
	Depreciation
	Capacity	347	[MW]
	Reference Module Efficiency	14.4	[-]
	Reference Plant Output	2.40972e+06	[m^2/yr]
	Equipment Depreciation Period	5	[yrs]
	Facility Depreciation Period	39	[yrs]
		Floor space [m^2]	Investment [$]	Equipment Payment [$/yr]	Facility Payment [$/yr]	Payment [$/m^2 Product]	Payment [$/W]	Individual Investment [MM/MW]
	Ingot + Wafer	46500	1.95868e+08	3.51497e+07	977412	14.9922	0.0731328	0.56446
	Cell	18000	144326610	2.45802e+07	549373	10.4284	0.0508703	0.415927
	Module	20000	7.22728e+07	1.09494e+07	449385	4.73032	0.0230747	0.208279
		Total [MM/MW]	1.18867			Total [$/W]	0.147078
	Maintenance
	Amount initial investment per year	0.05	[-]
		Payment [$/yr]	Payment [$/m^2 Product]	Payment [$/W]
	Ingot + Wafer	9.79338e+06	4.06411	0.0198249
	Cell	7.21633e+06	2.99467	0.0146082
	Module	3.61364e+06	1.49961	0.00731517
			Total [$/W]	0.0417483
	Wire Sawing
	Payment at reference plant output	22402800	[$/yr]
	Payment	9.29684	[$/m^2 Product]
	Payment	0.0453504	[$/W]
	Ingot Casting
	Payment at reference plant output	10287000	[$/yr]
	Payment	4.26896	[$/m^2 Product]
	Payment	0.0208242	[$/W]
	Labor
	Reference Plant Output	347	[MW/yr]
	Reference Module Efficiency	14.4	[-]
	Reference Power per Cell	3.50438	[W]
	Plant Output	2.40972e+06	[m^2/yr]
	People for Ingot	306	[people]
	People for Wafer	90	[people]
	People for Cell	150	[people]
	People for Module	150	[people]
	People per Watt Output	2.00576	[People/MW]
	Hours per year per Person	2244	[hrs/yr]
	Wafer labor hours per area	0.368766	[people hours/m^2]
	Cell labor hours per area	0.139684	[people hours/m^2]
	Module labor hours per area	0.139684	[people hours/m^2]
	Wafer labor cost per area	9.03938	[$/m^2]
	Cell labor cost per area	3.42401	[$/m^2]
	Module labor cost per area	3.42401	[$/m^2]
	Actual Cell output per m^2	205	[W/m^2]
	Wafer labor cost	0.0440945	[$/W]
	Cell labor cost	0.0167025	[$/W]
	Module labor cost	0.0167025	[$/W]
	Labor Cost	0.0774995	[$/W]
	Input Electricity
	Reference Module Efficiency	14.4	[%]
	Ingot Solidification Need at Ref Efficiency	25.9	[kWh/kg]
	Ingot Solidification Need at Ref Efficiency	0.014549	[kWh/W]
	Wafering Need at Ref Efficiency	0.04	[kWh/W]
	Cell Need at Ref Efficiency	0.34	[kWh/W]
	Module Need at Ref Efficiency	0.05	[kWh/W]
	Wafer Electricity Cost	0.00344856	[$/w]
	Cell Electricity Cost	0.0214946	[$/w]
	Module Electricity Cost	0.00316098	[$/w]
	Total Energy Cost	0.0281042	[$/w]
	Yield Loss
	Wafering Yield	0.97	[-]
	Cell Process Yield	0.965	[-]
	Module Process Yield	0.98	[-]
	Shipping Yield	1	[-]
	Value during wafer breakage	0.152611	[$/W]
	Value during cell breakage	0.333826	[$/W]
	Value during module breakage	0.583565	[$/W]
	Value during shipping	0.583565	[$/W]
	Wafer Yield Loss	0.00471994	[$/W]
	Cell Yield Loss	0.0121077	[$/W]
	Module Yield Loss	0.0119095	[$/W]
	Shipping Yield Loss	0	[$/W]
	Total Yield Loss	0.0287371	[$/W]
	Packaging
	Cardboard cost	0.15	[$/m^2]
	Packaging	0.88594	[$/Module]
	Cost of Packaging	0.00219512	[$/W]
	Metal Paste
	Cost of Silver Paste	300	[$/kg]
	Silver Paste utilization	0.225	[g/cell]
	Cost of Silver Paste	0.0675	[$/cell]
	Cost of Al Paste	150	[$/kg]
	Al Paste utilization	1	[g/cell]
	Cost of Al Paste	0.15	[$/cell]
	Cost of Metal Paste	0.2175	[$/cell]
	Other Costs
	Reference Cell number	60	[-]
	Reference Module Area	1.6	[m^2]
		[$/Module] at Reference Area	[$/Module] at actual area	Cost [$/W]
	Frame Cost	15	17.1274	0.0424372
	Backsheet Cost	11.5	14.1504	0.035061
	Encapsulant Cost	9	11.0742	0.027439
	Glass Cost	17	20.918	0.0518293
	JB and Cable	10		0.04
	Ribbon	7.5	9.22854	0.0228659
	Screen Prints per cell	4	[prints/cell]
	Lifetime of Screen	8000	[prints]
	Cost of Screen	100	[$]
	Cost of Screen	0.05	[$/cell]
	Shipping Costs from China to US
	Watts in container	141120	[W/container]
	Shipping Costs	0	[$/container]
	Shipping Cost	0	[$/w]
	Import Duty (FOB)
	Is Imported	0	[-]
	Import Duty	0	[$/w]

## Sheet: 2020 Waferfall 3
Waterfall Step 3: Manufacturing and module innovations
Feb 2012
Doug Powell
MIT Photovoltaic Research Laboratory
	Inputs
	Item	Value	Unit
	Module Efficiency	20.5	[%]
	Cell Thickness	50	[μm]
	Material Yield	0.9	[-]
	Contract Silicon Price	25	[$/kg]
	Labor	24.5125	[$/hr]
	Electricity Cost	0.09	[$/kwh]
	Shipping Costs	0	[$/container]
	Outputs
	Silicon Use	0.612362	[g/Wp]
	Cost Breakdown								Allotment [$/W]				Allotment Specific Modifier [$/W]
	Item	Cost [$/cell]	Adder [$/W]	Adder [$/cell]	Tech Multiplier	Learning Multiplier	Cost [$/W]	Percentage	Wafer	Cell	Module	Other	Wafer	Cell	Module	Other
	Silicon Feedstock	0.0787202			1	1	0.0140434	0.0268691	0.0140434
	Depreciation		NA	NA	1	1	0.147078	0.281402	0.0731328	0.0508703	0.0230747
	Maintenance		NA	NA	1	0.9025	0.0376778	0.0720883	0.017892	0.0131839	0.00660194
	Labor		NA	NA	1	1	0.05857	0.112061	0.0318461	0.013362	0.013362
	Input Electricity		NA	NA	1	1	0.0281042	0.0537713	0.00344856	0.0214946	0.00316098
	Metal Paste	0.3			1	1	0.053519	0.102397		0.053519
	Ingot Casting				0	0.9025	0	0	0
	Wire Sawing				0	0.9025	0	0	0
	Glass				1	0.9025	0.0467759	0.0894956			0.0467759
	Frame				0	0.9025	0	0			0
	Encapsulant				1	0.9025	0.0247637	0.04738			0.0247637
	JB and Cable				1	0.9025	0.0361	0.0690695			0.0361
	Chemicals	0.18			0.52	1	0.0166979	0.0319479		0.0166979
	Back Sheet				1	0.9025	0.0316425	0.0605411			0.0316425
	Yield Loss		NA	NA	1	1	0.0257081	0.0491869	0.00434112	0.0112251	0.0101419	0
	Ribbon				0	0.9025	0	0			0
	Packaging				1	0.9025	0.0019811	0.0037904			0.0019811
	Screens	0.05			0	0.9025	0	0		0
	Shipping costs				1	1	0	0				0
	Import Duty (FOB)				1	1	0	0				0
	Total						0.522662	1	0.144704	0.180353	0.197605	0
	Calculations
	Power
	Number of Cells per Module	72	[cells/module]
	Area Utilization	89	[%]
	Area of module	1.96876	[m^2/module]
	Power Out Per Module	403.595	[W/module]
	Learning Multiplier
	Number of Doublings	2	[-]
	Drop per double	5	[%]
	Total multiplier	0.9025	[-]
	Silicon Feedstock
	Silicon Density	2329	[kg/m^3]
	Mass of Si per Cell without breakage	0.00314881	[kg/cell]
	Dollars per Cell	0.0787202	[$/cell]
	Depreciation
	Capacity	347	[MW]
	Reference Module Efficiency	14.4	[-]
	Reference Plant Output	2.40972e+06	[m^2/yr]
	Equipment Depreciation Period	5	[yrs]
	Facility Depreciation Period	39	[yrs]
		Floor space [m^2]	Investment [$]	Equipment Payment [$/yr]	Facility Payment [$/yr]	Payment [$/m^2 Product]	Payment [$/W]	Individual Investment [MM/MW]
	Ingot + Wafer	46500	1.95868e+08	3.51497e+07	977412	14.9922	0.0731328	0.56446
	Cell	18000	144326610	2.45802e+07	549373	10.4284	0.0508703	0.415927
	Module	20000	7.22728e+07	1.09494e+07	449385	4.73032	0.0230747	0.208279
		Total [MM/MW]	1.18867			Total [$/W]	0.147078
	Maintenance
	Amount initial investment per year	0.05	[-]
		Payment [$/yr]	Payment [$/m^2 Product]	Payment [$/W]
	Ingot + Wafer	9.79338e+06	4.06411	0.0198249
	Cell	7.21633e+06	2.99467	0.0146082
	Module	3.61364e+06	1.49961	0.00731517
			Total [$/W]	0.0417483
	Wire Sawing
	Payment at reference plant output	22402800	[$/yr]
	Payment	9.29684	[$/m^2 Product]
	Payment	0.0453504	[$/W]
	Ingot Casting
	Payment at reference plant output	10287000	[$/yr]
	Payment	4.26896	[$/m^2 Product]
	Payment	0.0208242	[$/W]
	Labor
	Reference Plant Output	347	[MW/yr]
	Reference Module Efficiency	14.4	[-]
	Reference Power per Cell	3.50438	[W]
	Plant Output	2.40972e+06	[m^2/yr]
	People for Ingot	196	[people]
	People for Wafer	90	[people]
	People for Cell	120	[people]
	People for Module	120	[people]
	People per Watt Output	1.51585	[People/MW]
	Hours per year per Person	2244	[hrs/yr]
	Wafer labor hours per area	0.266331	[people hours/m^2]
	Cell labor hours per area	0.111747	[people hours/m^2]
	Module labor hours per area	0.111747	[people hours/m^2]
	Wafer labor cost per area	6.52844	[$/m^2]
	Cell labor cost per area	2.73921	[$/m^2]
	Module labor cost per area	2.73921	[$/m^2]
	Actual Cell output per m^2	205	[W/m^2]
	Wafer labor cost	0.0318461	[$/W]
	Cell labor cost	0.013362	[$/W]
	Module labor cost	0.013362	[$/W]
	Labor Cost	0.05857	[$/W]
	Input Electricity
	Reference Module Efficiency	14.4	[%]
	Ingot Solidification Need at Ref Efficiency	25.9	[kWh/kg]
	Ingot Solidification Need at Ref Efficiency	0.014549	[kWh/W]
	Wafering Need at Ref Efficiency	0.04	[kWh/W]
	Cell Need at Ref Efficiency	0.34	[kWh/W]
	Module Need at Ref Efficiency	0.05	[kWh/W]
	Wafer Electricity Cost	0.00344856	[$/w]
	Cell Electricity Cost	0.0214946	[$/w]
	Module Electricity Cost	0.00316098	[$/w]
	Total Energy Cost	0.0281042	[$/w]
	Yield Loss
	Wafering Yield	0.97	[-]
	Cell Process Yield	0.965	[-]
	Module Process Yield	0.98	[-]
	Shipping Yield	1	[-]
	Value during wafer breakage	0.140363	[$/W]
	Value during cell breakage	0.309491	[$/W]
	Value during module breakage	0.496954	[$/W]
	Value during shipping	0.496954	[$/W]
	Wafer Yield Loss	0.00434112	[$/W]
	Cell Yield Loss	0.0112251	[$/W]
	Module Yield Loss	0.0101419	[$/W]
	Shipping Yield Loss	0	[$/W]
	Total Yield Loss	0.0257081	[$/W]
	Packaging
	Cardboard cost	0.15	[$/m^2]
	Packaging	0.88594	[$/Module]
	Cost of Packaging	0.00219512	[$/W]
	Metal Paste
	Cost of Silver Paste	150	[$/kg]
	Silver Paste utilization	0	[g/cell]
	Cost of Silver Paste	0	[$/cell]
	Cost of Al Paste	300	[$/kg]
	Al Paste utilization	1	[g/cell]
	Cost of Al Paste	0.3	[$/cell]
	Cost of Metal Paste	0.3	[$/cell]
	Other Costs
	Reference Cell number	60	[-]
	Reference Module Area	1.6	[m^2]
		[$/Module] at Reference Area	[$/Module] at actual area	Cost [$/W]
	Frame Cost	15	17.1274	0.0424372
	Backsheet Cost	11.5	14.1504	0.035061
	Encapsulant Cost	9	11.0742	0.027439
	Glass Cost	17	20.918	0.0518293
	JB and Cable	10		0.04
	Ribbon	7.5	9.22854	0.0228659
	Screen Prints per cell	4	[prints/cell]
	Lifetime of Screen	8000	[prints]
	Cost of Screen	100	[$]
	Cost of Screen	0.05	[$/cell]
	Shipping Costs from China to US
	Watts in container	141120	[W/container]
	Shipping Costs	0	[$/container]
	Shipping Cost	0	[$/w]
	Import Duty (FOB)
	Is Imported	0	[-]
	Import Duty	0	[$/w]
